# Supplementary material for: Leveraging Machine Learning and Geo-Tagged Citizen Science Data to Disentangle the Factors of Avian Mortality Events at the Species Level
Source: MDPI journal article supplement (doi:10.3390/rs14102369), 2022-05-14
Supplement: s1 [file s1]

*Supplementary Materials for*

# **Leveraging Machine Learning and Geo-tagged Citizen Science Data to Disentangle the Factors of Avian Mortality Events at the Species Level**

Anni Yang, Matthew Rodriguez, Di Yang, Jue Yang, Wenwen Cheng, Changjie Cai, Han Qiu

**Table S1.** The optimal parameters for RF models by controlling ntree=500 for each species.

|                  | mtry | Node size | Sample fraction |
|------------------|------|-----------|-----------------|
| Wilson's Warbler | 3    | 2         | 0.59            |
| Barn Owl         | 10   | 9         | 0.60            |
| Common Murre     | 8    | 3         | 0.9             |

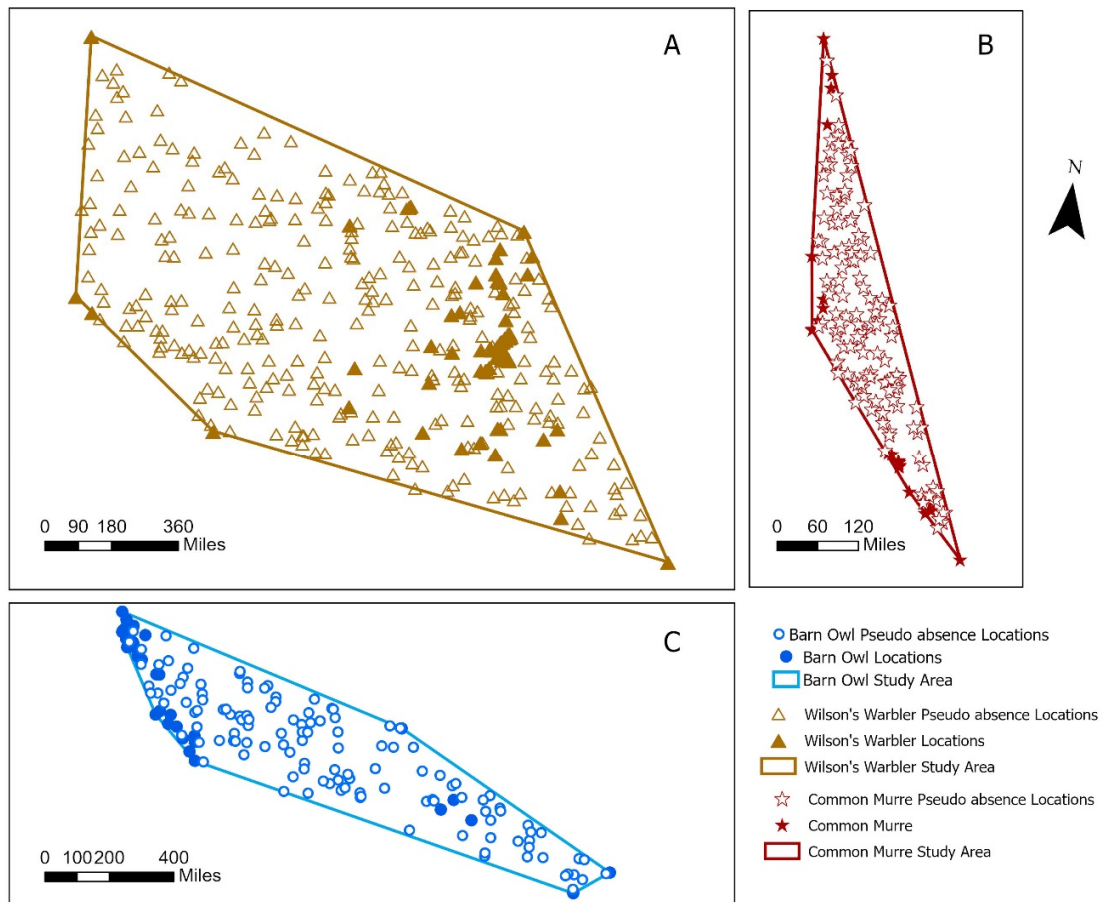

**Figure S1.** Distributions of the presence and pseudo-absence locations for the (A) Wilson's Warbler, (B) Common Murre, and (C) Barn Owl.

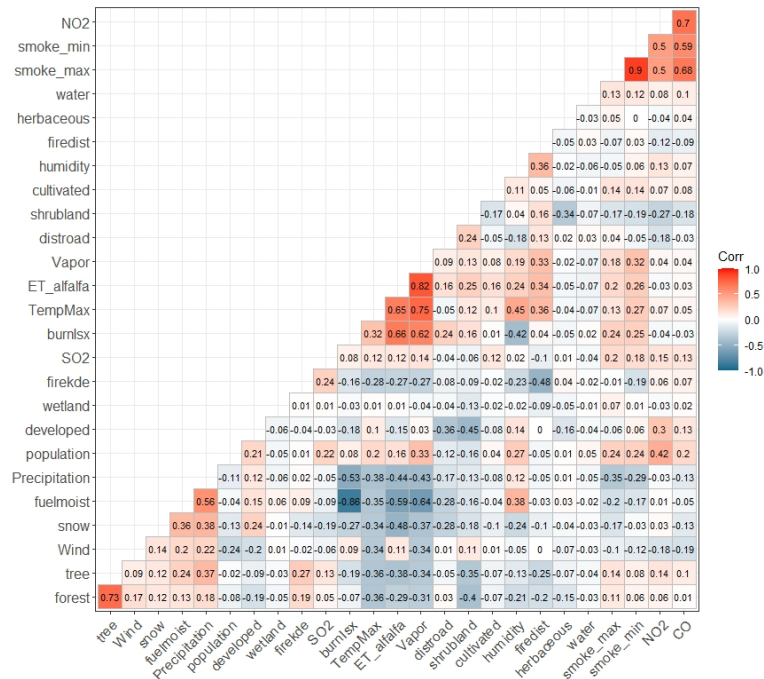

**Figure S2.** Pearson's correlations for the potential variables used to predict the spatial distributions of mortality of Wilson's Warbler.

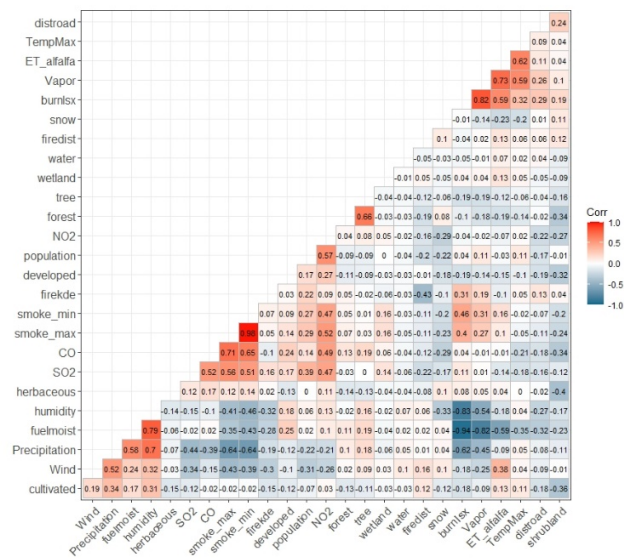

**Figure S3.** Pearson's correlations for the potential variables used to predict the spatial distributions of mortality of Barn Owl.

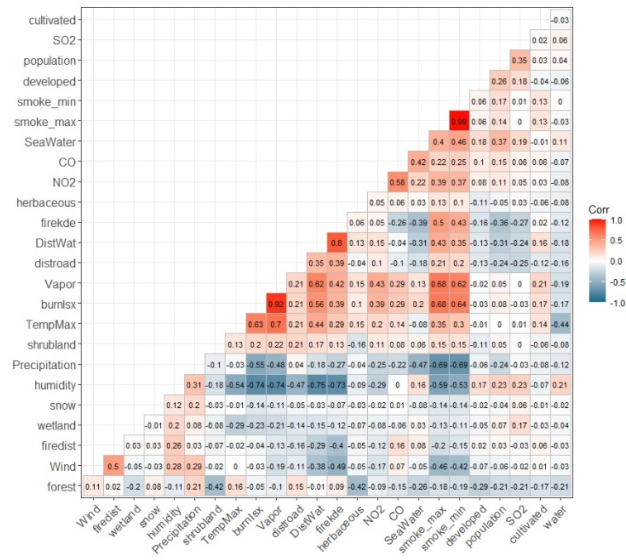

**Figure S4.** Pearson's correlations for the potential variables used to predict the spatial distributions of mortality of Common Murre.
